# Supplementary material for: A comparative study of the structure and optical properties of copper sulfide thin films chemically deposited on various substrates
Source: Royal Society of Chemistry journal article supplement (doi:10.1039/c3ra42528b), 2013-01-01
Supplement: c3ra42528b.pdf [file c3ra42528b.pdf]

# A Comparative Study of the Structure and Optical Properties of Copper Sulfide Thin Films Chemically Deposited on Various Substrates

Tsofnat Safrani<sup>[1][2]</sup>, Jürgen Jopp<sup>[2]</sup> and Yuval Golan<sup>[1][2]</sup>

[1] Department of Materials Engineering, Ben-Gurion University of the Negev, Beer-Sheva 84105, Israel.

[2] Ilse Katz Institute for Nanoscale Science and Technology, Ben-Gurion University of the Negev, Beer-Sheva 84105, Israel.

Fax: +972-8-6472944; Tel: +972-8-6466297; E-mail: [ygolan@bgu.ac.il](mailto:ygolan@bgu.ac.il)

## Supplementary information on ellipsometry measurements:

The model consisted of a substrate, *Cauchy* layer (thin film) and air with refractive indices  $n_s$ ,  $n_f$  and  $n_a=1$  and extinction coefficients  $k_s$ ,  $k_f$  and  $k_a=0$ , respectively. The values for  $n_f$  and  $k_f$  were approximated by *Cauchy* formulas (Eq. 1 and Eq. 2, where  $\lambda$  is in nm). The data of each measurement was divided into four sets (400-500 nm, 500-600 nm, 600-700 nm and 700-800 nm). In each interval the same fixed thickness value was used, and the six *Cauchy* parameters  $n_0$ ,  $n_1$ ,  $n_2$ ,  $k_0$ ,  $k_1$  and  $k_2$  were fitted (see Table 1). The fitting curves ( $\Delta$ ) and  $\Psi$ ) of each interval are shown in Figures 1 to 7 (the fitting curves of the last two intervals are not available).

$$n_f(\lambda) = n_0 + \frac{0.01 \times n_1}{\lambda^2} + \frac{10^{-7} \times n_2}{\lambda^4} \quad (1)$$

$$k_f(\lambda) = k_0 + \frac{0.01 \times k_1}{\lambda^2} + \frac{10^{-7} \times k_2}{\lambda^4} \quad (2)$$

Table 1: Fitting results of the six *Cauchy* parameters

| Dataset                              | d [nm] | n0    | n1       | n2      | k0     | k1         | k2        |
|--------------------------------------|--------|-------|----------|---------|--------|------------|-----------|
| Cu <sub>x</sub> S on GaAs 400-500 nm | 59     | 1.283 | 3865.7   | -4028.3 | -0.42  | 2124.083   | -466.139  |
| Cu <sub>x</sub> S on GaAs 500-600 nm | 59     | 1.046 | 5289.2   | -6078.1 | -0.099 | 312.362    | 2048.006  |
| Cu <sub>x</sub> S on GaAs 600-700 nm | 59     | 1.278 | 4354.1   | -5693.1 | -0.119 | 836.212    | 480.112   |
| Cu <sub>x</sub> S on GaAs 700-800 nm | 59     | 1.574 | 2732.9   | -5032.2 | 0.066  | -495.547   | 2691.689  |
| Cu <sub>x</sub> S on Si 400-500 nm   | 75     | 0.877 | 4677.2   | -4475.7 | -0.628 | 3263.003   | -1764.44  |
| Cu <sub>x</sub> S on Si 500-600 nm   | 75     | 0.681 | 5208.4   | -4501.2 | 0.219  | -882.159   | 3374.316  |
| Cu <sub>x</sub> S on Si 600-700 nm   | 75     | 1.645 | -2129.1  | 9450.4  | 0.434  | -2196.341  | 5503.363  |
| Cu <sub>x</sub> S on Si 700-800 nm   | 75     | 3.312 | -16685.2 | 39997.9 | 1.578  | -14560.945 | 39755.371 |
| Cu <sub>x</sub> S on Si 650-750 nm   | 75     | 2.188 | -7530.5  | 22822.5 | 2.133  | -17482.217 | 39993.316 |

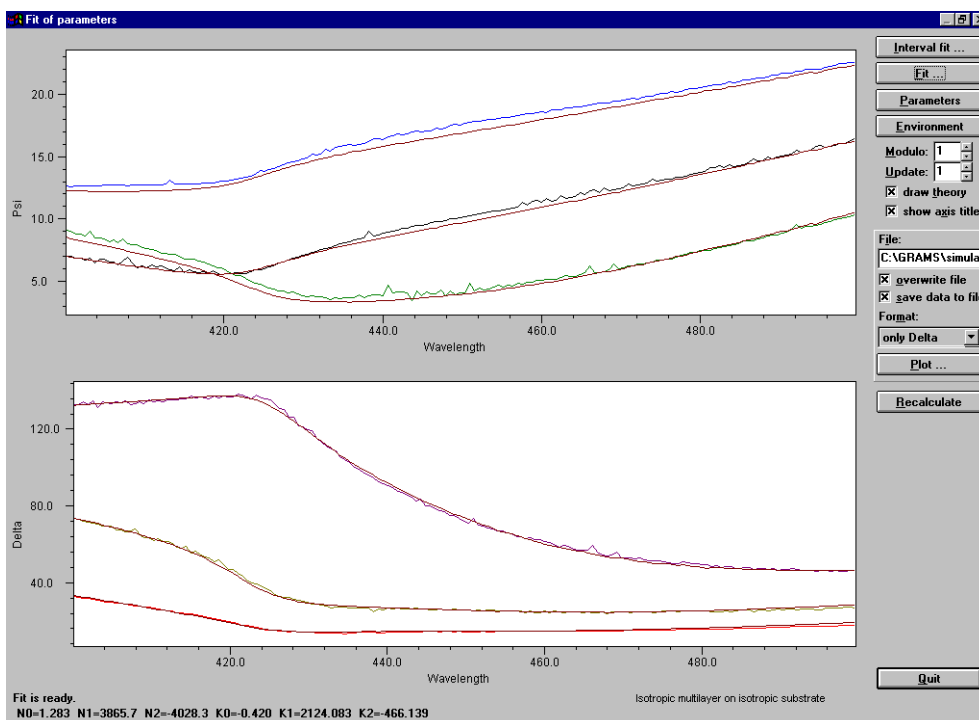

Figure 1: Delta ( $\Delta$ ) and psi ( $\Psi$ ) fitting curves of  $\text{Cu}_x\text{S}$  films grown on GaAs substrate in the 400-500nm wavelength interval.

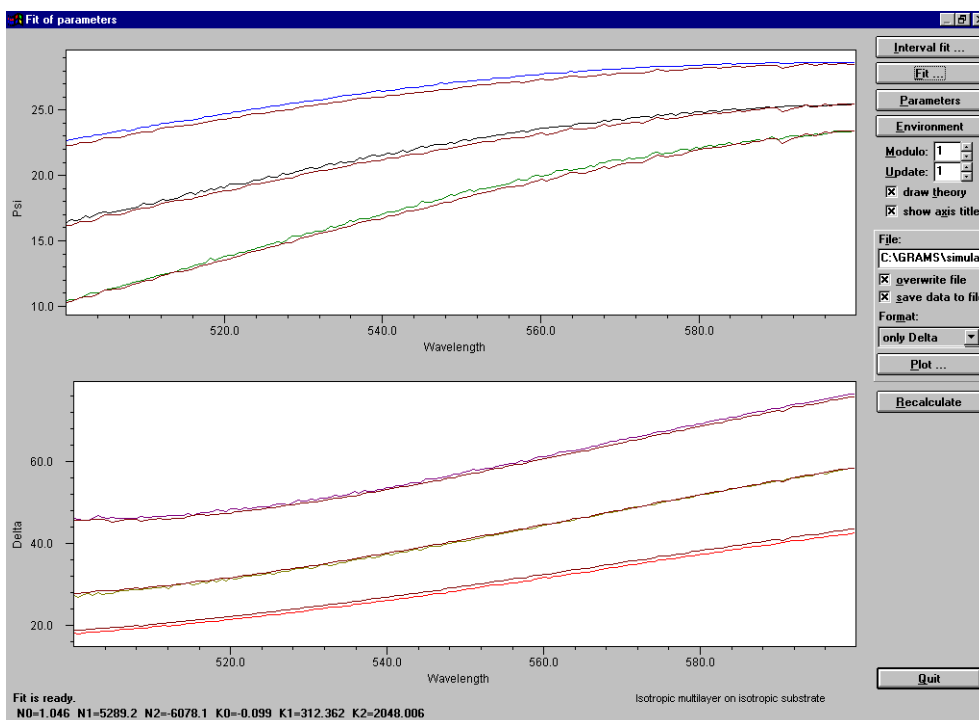

Figure 2: Delta ( $\Delta$ ) and psi ( $\Psi$ ) fitting curves of  $\text{Cu}_x\text{S}$  films grown on GaAs substrate in the 500-600nm wavelength interval.

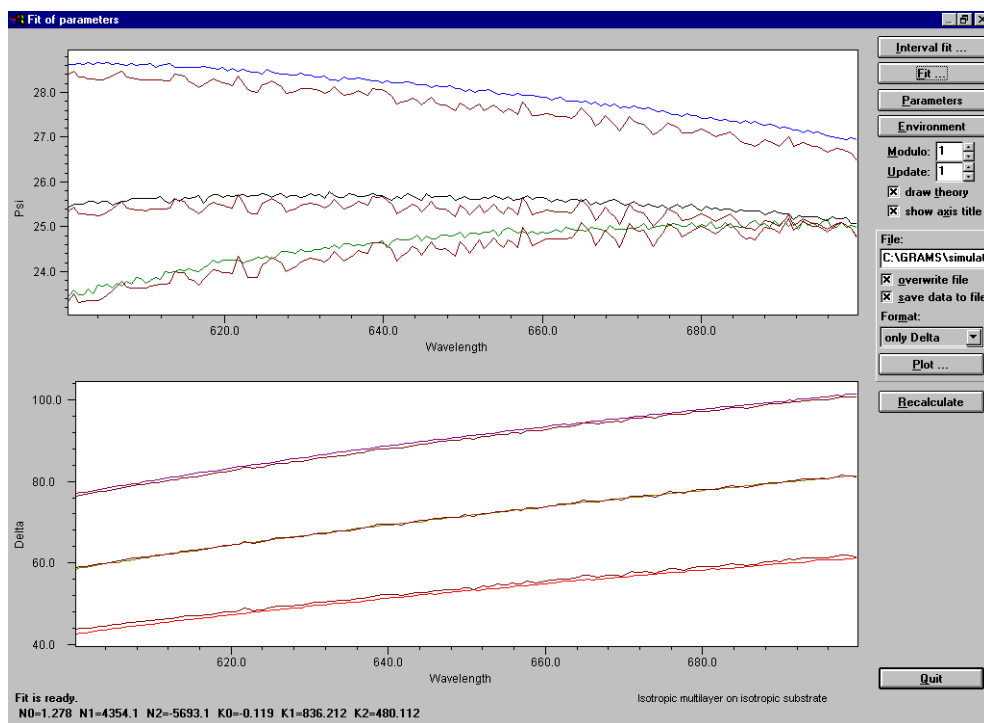

Figure 3: Delta ( $\Delta$ ) and psi ( $\Psi$ ) fitting curves of  $Cu_xS$  films grown on GaAs substrate in the 600-700nm wavelength interval.

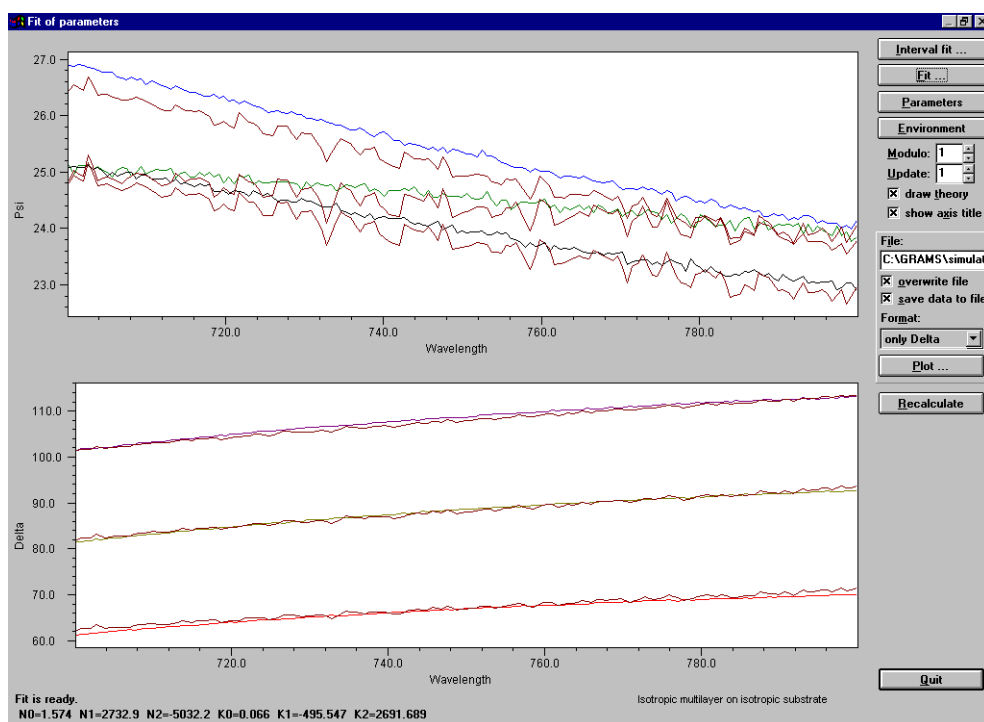

Figure 4: Delta ( $\Delta$ ) and psi ( $\Psi$ ) fitting curves of  $Cu_xS$  films grown on GaAs substrate in the 700-800nm wavelength interval.

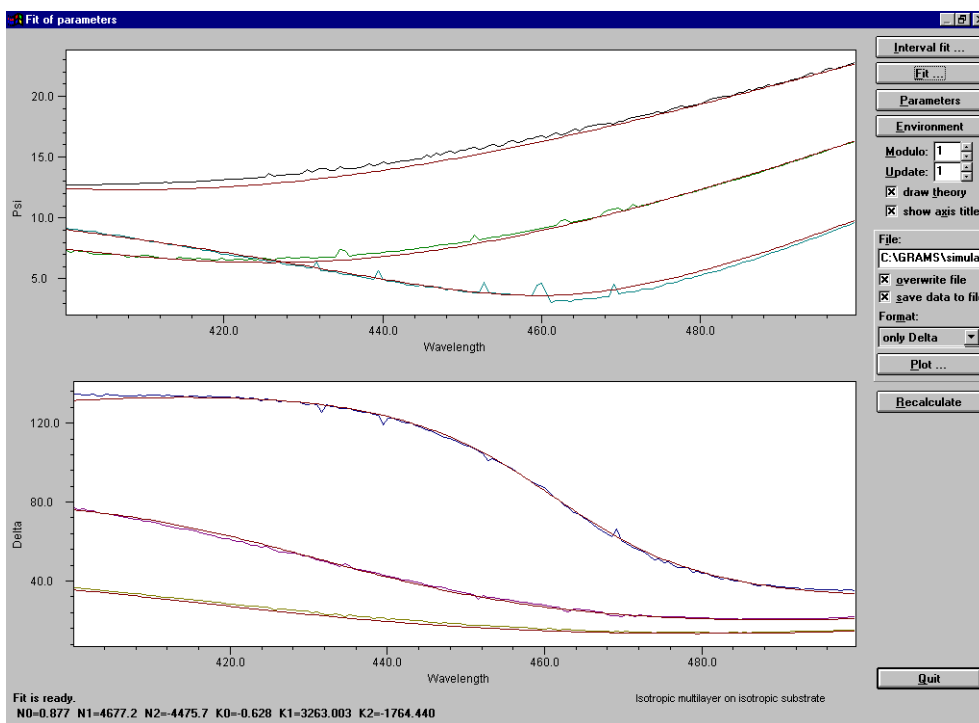

Figure 5: Delta ( $\Delta$ ) and psi ( $\Psi$ ) fitting curves of  $\text{Cu}_x\text{S}$  films grown on Si substrate in the 400-500nm wavelength interval.

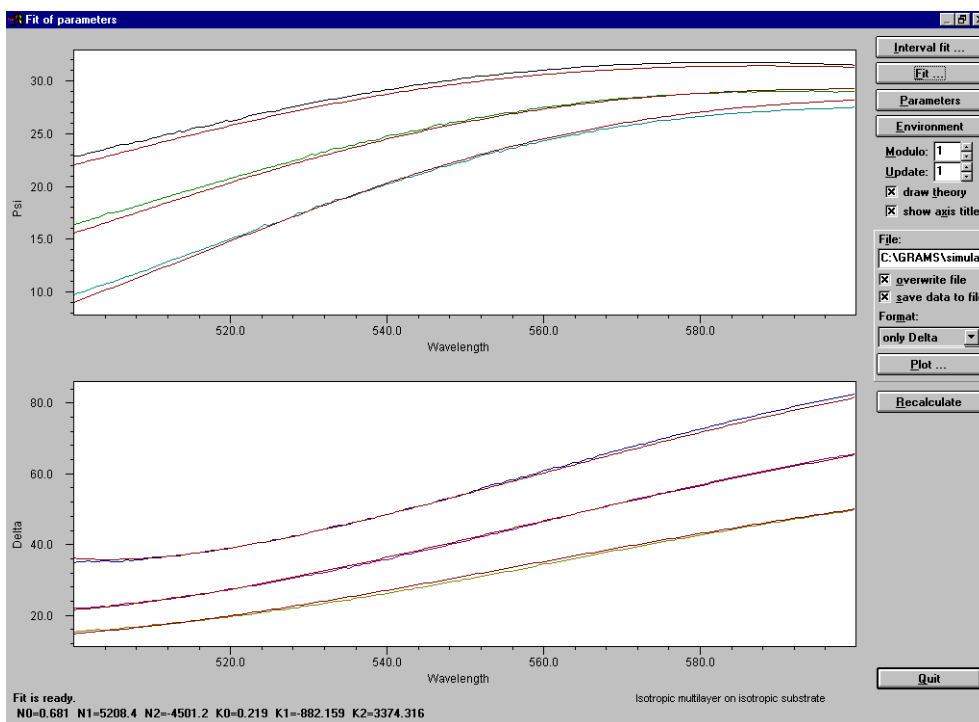

Figure 6: Delta ( $\Delta$ ) and psi ( $\Psi$ ) fitting curves of  $\text{Cu}_x\text{S}$  films grown on Si substrate in the 500-600nm wavelength interval.

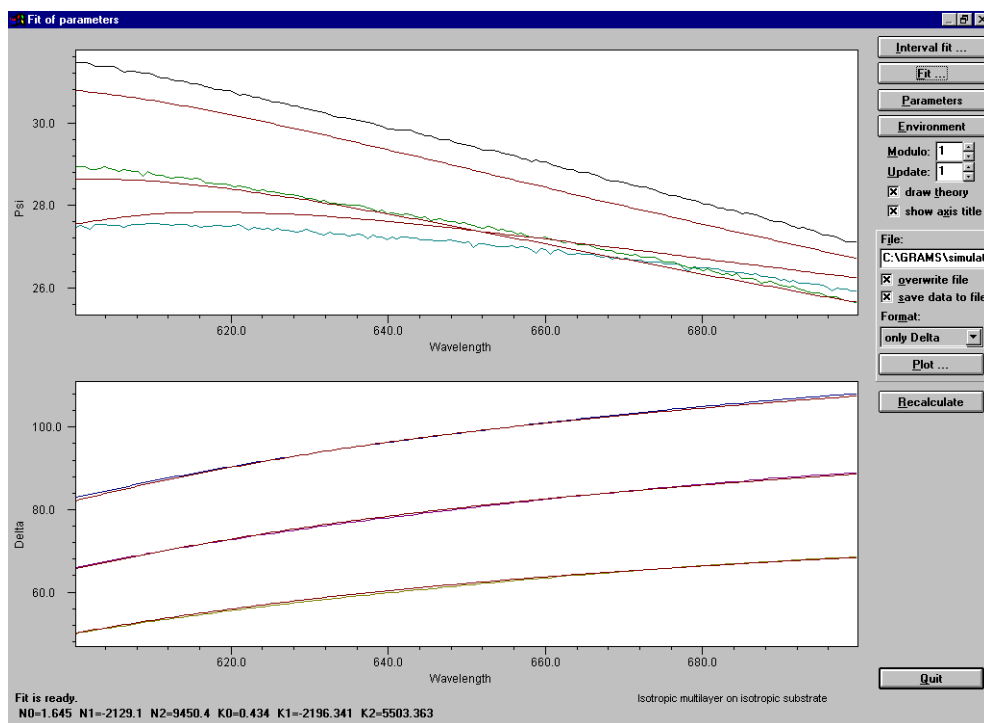

Figure 7: Delta ( $\Delta$ ) and psi ( $\Psi$ ) fitting curves of  $\text{Cu}_x\text{S}$  films grown on Si substrate in the 600-700nm wavelength interval.
